# Supplementary material
Source: Springer Nature journal article supplement (https://www.springermedizin.de/resource/supplementary/12957_2013_1740_MOESM1_ESM.pdf/9563366)

*GLI1* mRNA expression

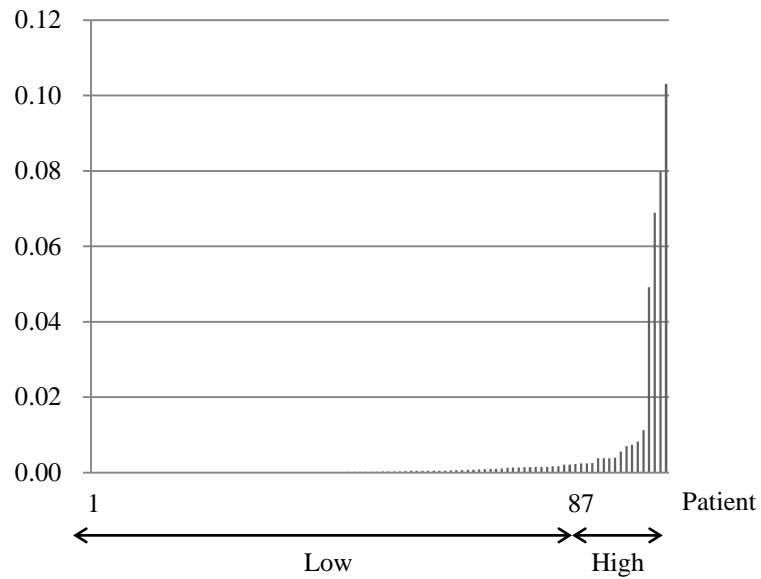

*GLI2* mRNA expression

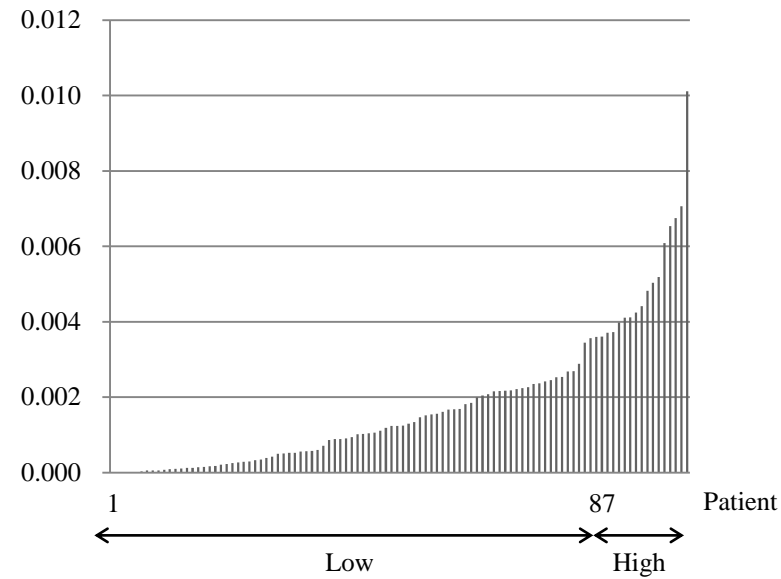

*GLI3* mRNA expression

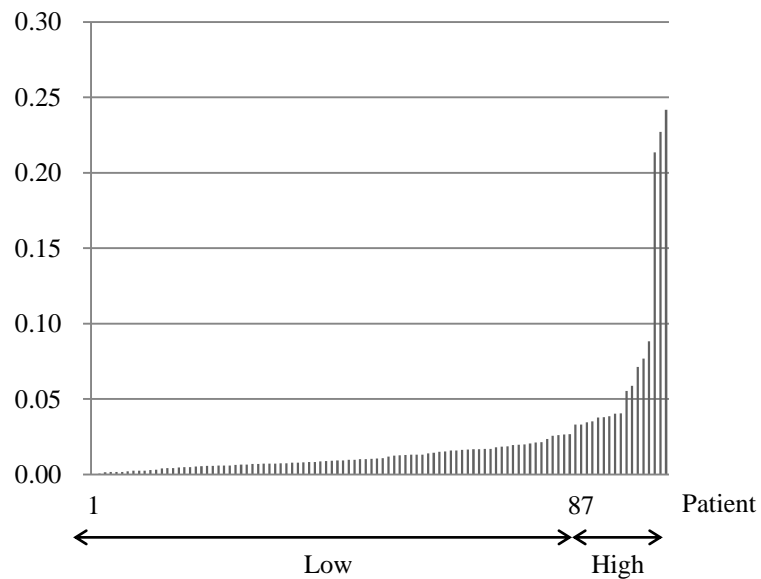

Supplement: MOESM1 [file 9563366]
